# Supplementary figures and images for: Structural features based genome-wide characterization and prediction of nucleosome organization
Source: Springer Nature journal article supplement (doi:10.1186/1471-2105-13-49), 2012-03-26

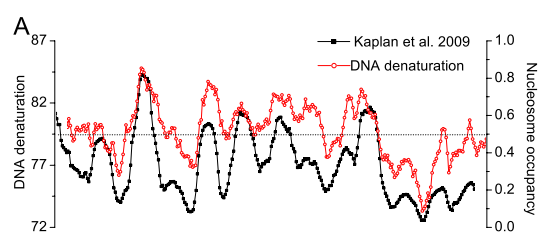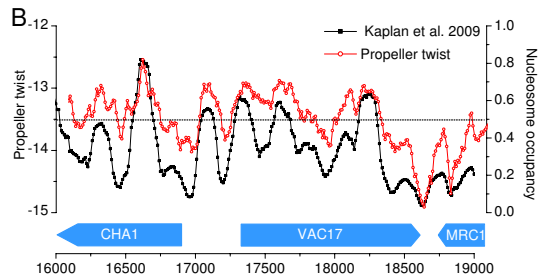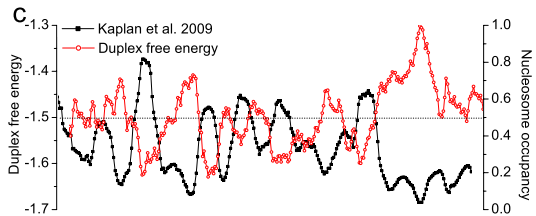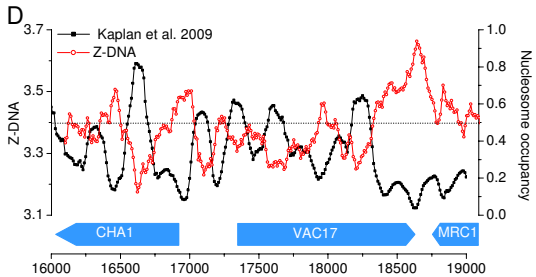

Supplement: 12859_2011_5203_MOESM3_ESM.pdf [file 12859_2011_5203_MOESM3_ESM.pdf]

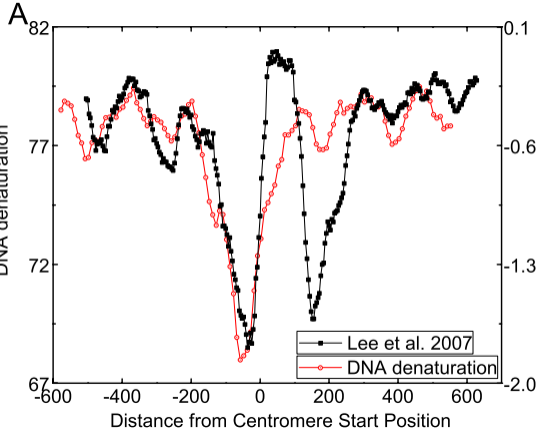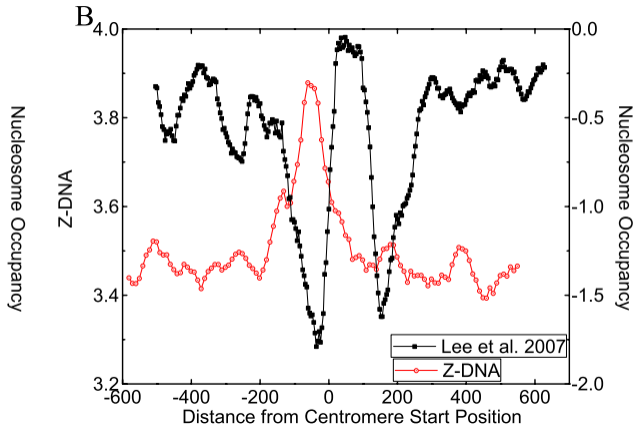

Supplement: 12859_2011_5203_MOESM4_ESM.pdf [file 12859_2011_5203_MOESM4_ESM.pdf]

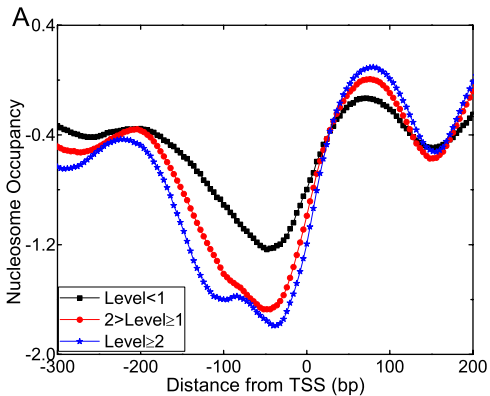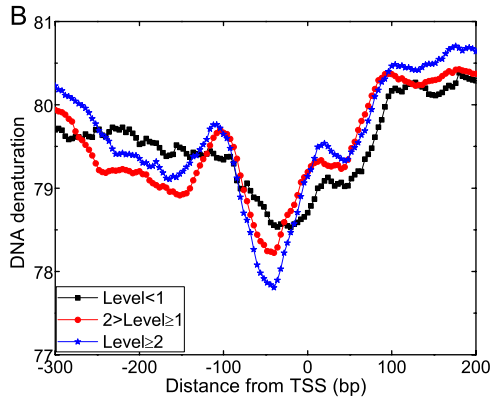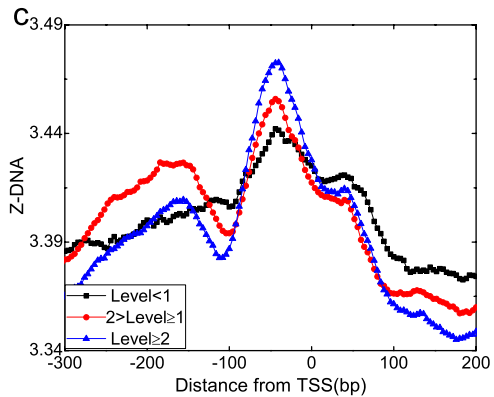

Supplement: 12859_2011_5203_MOESM5_ESM.pdf [file 12859_2011_5203_MOESM5_ESM.pdf]

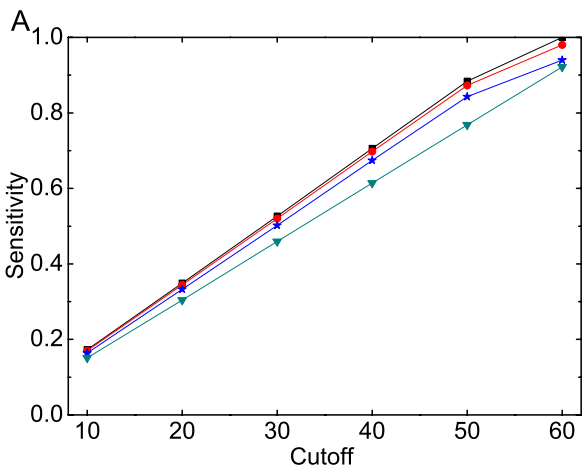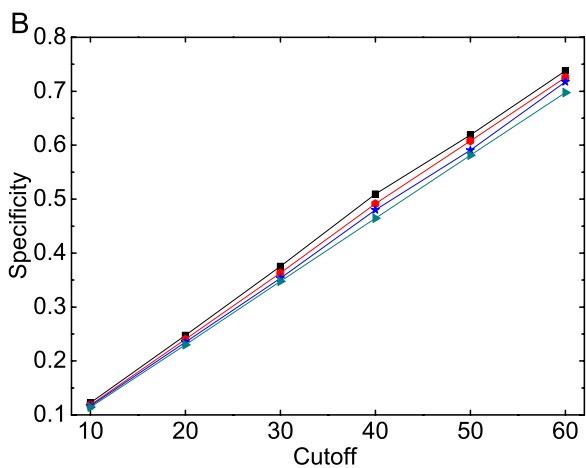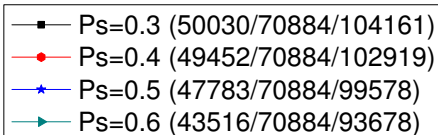

Supplement: 12859_2011_5203_MOESM6_ESM.pdf [file 12859_2011_5203_MOESM6_ESM.pdf]

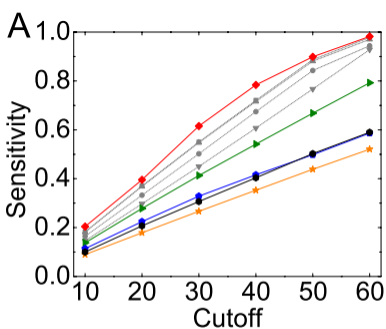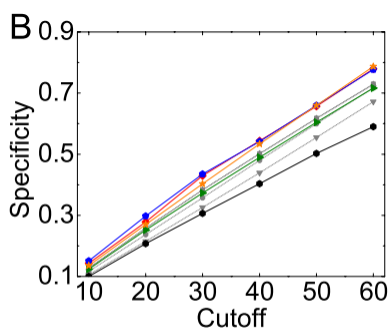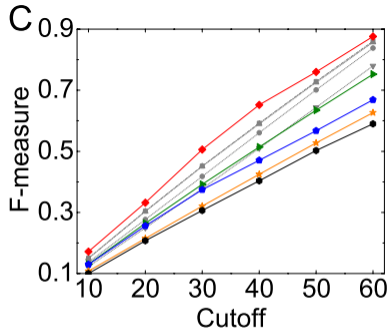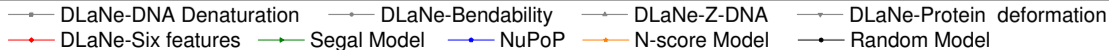

Supplement: 12859_2011_5203_MOESM7_ESM.pdf [file 12859_2011_5203_MOESM7_ESM.pdf]

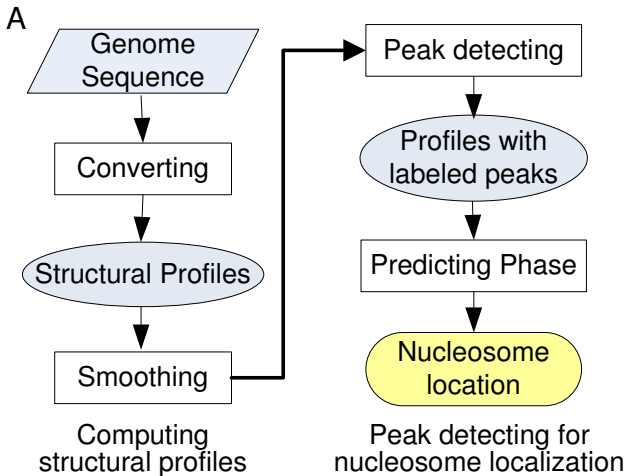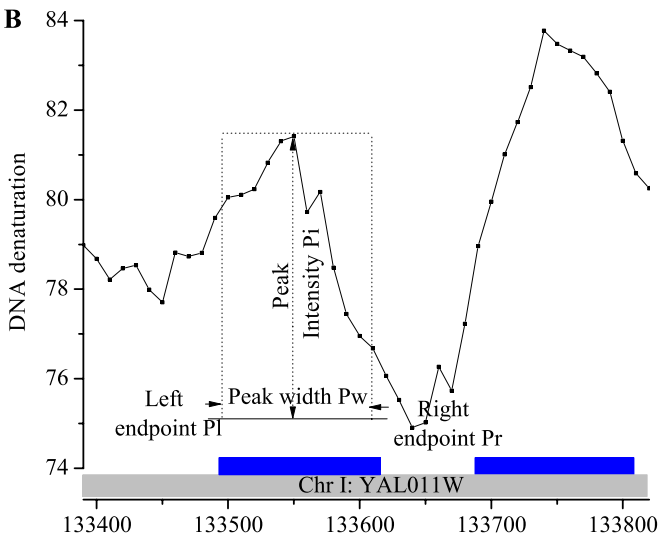

Supplement: 12859_2011_5203_MOESM8_ESM.pdf [file 12859_2011_5203_MOESM8_ESM.pdf]
